# Supplementary material
Source: PubMed Central journal article supplement (PMC6452898)

**a**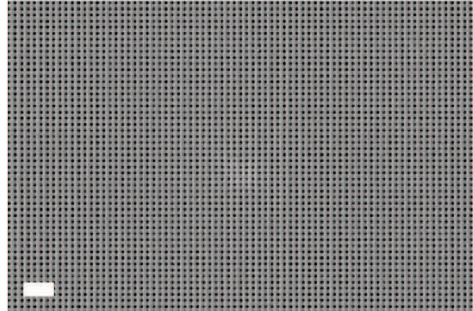

Pitch Size (PS) = 400 nm

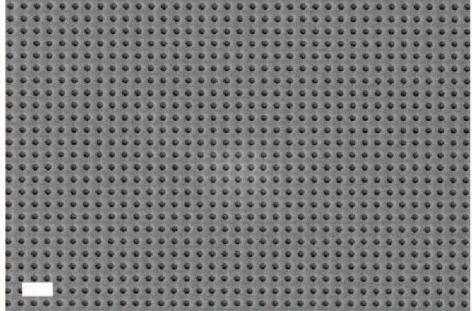

PS = 800 nm

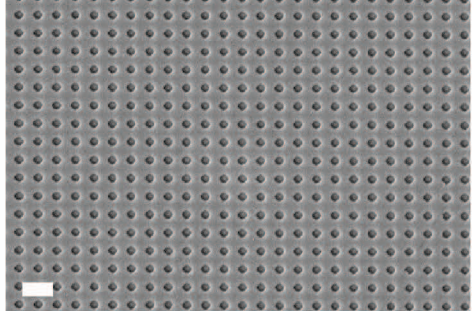

PS = 1,200 nm

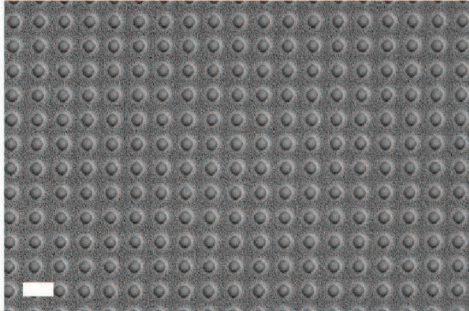

PS = 1,600 nm

**b**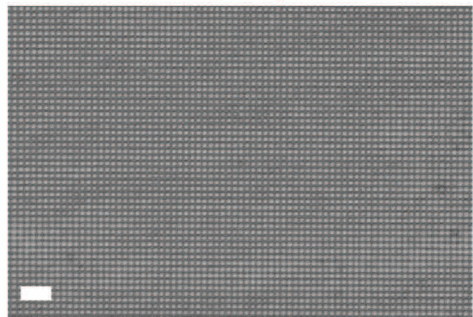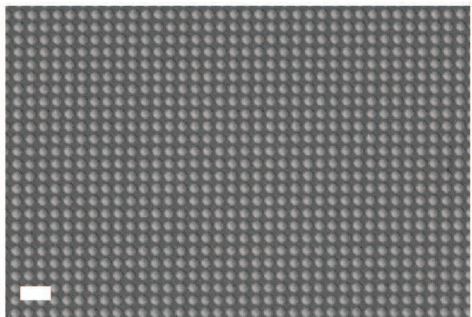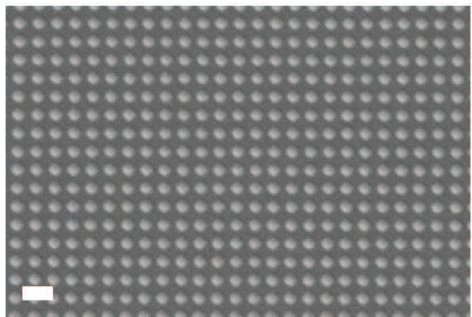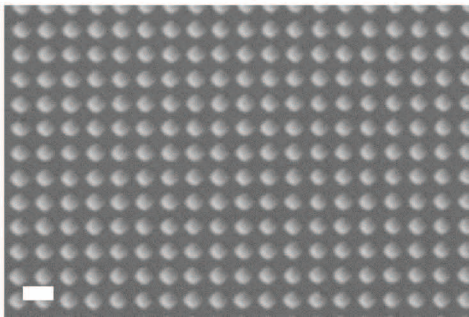

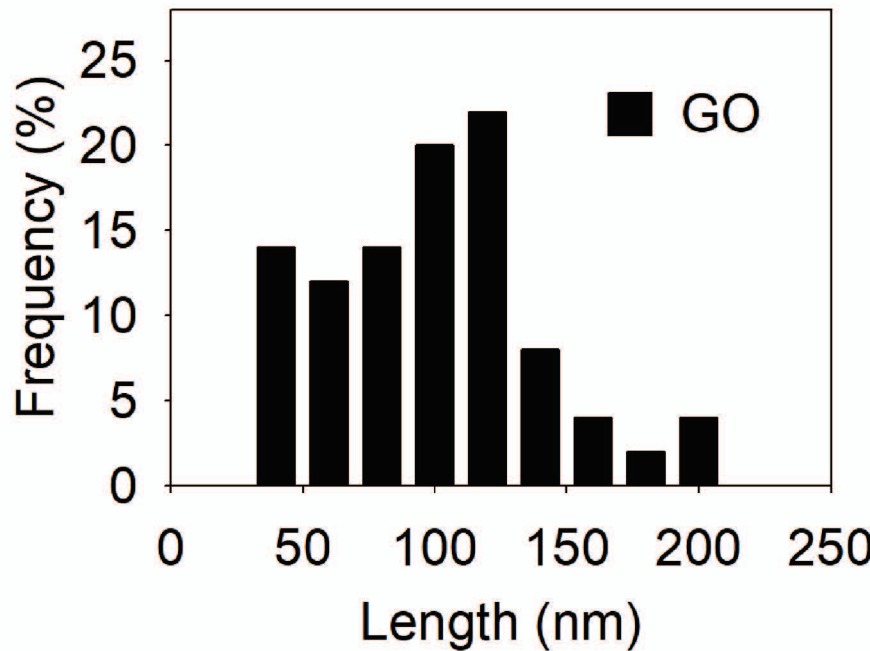

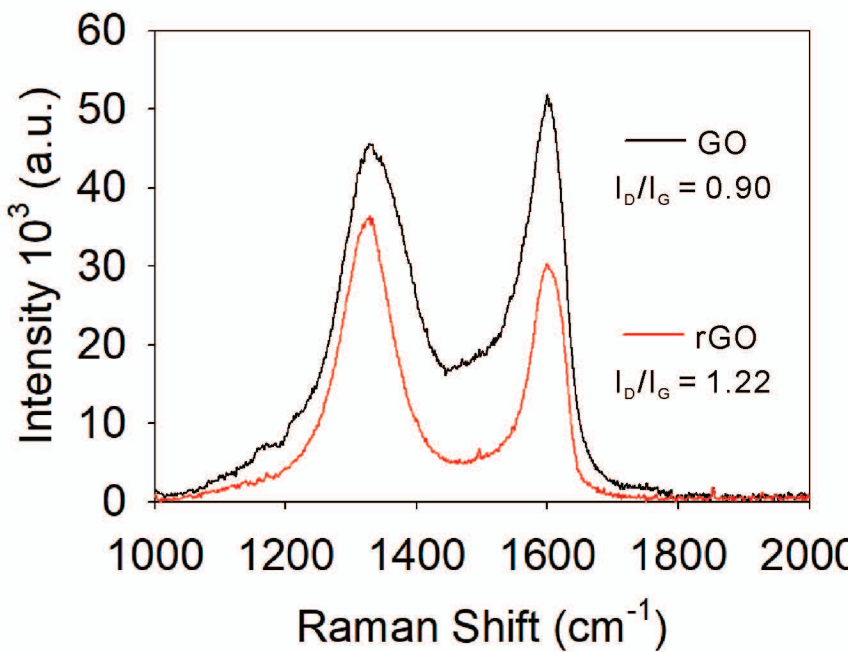

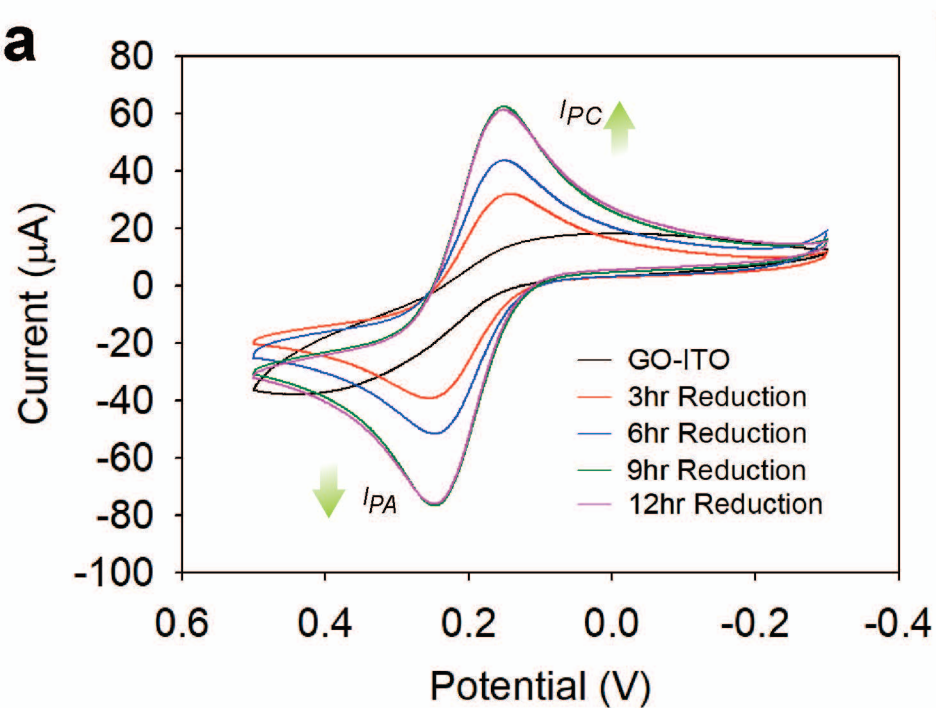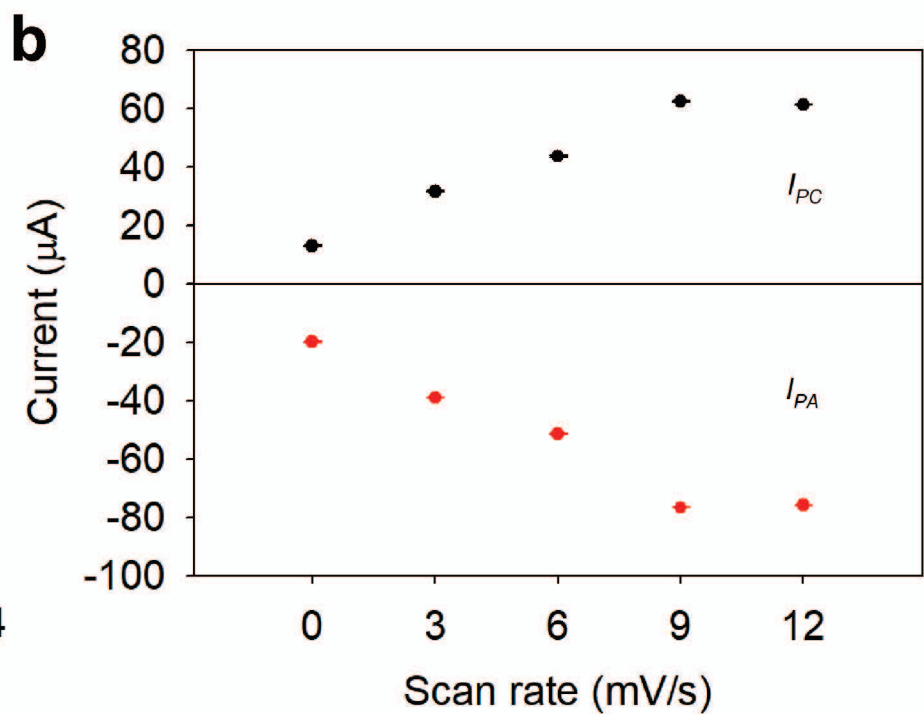

# Oxidation ( $I_{PA}$ )

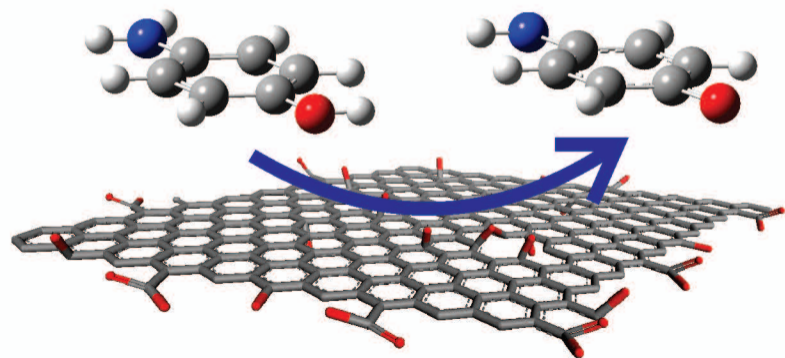

ITO -4.7eV

Au -4.8eV

RGO -5.0eV

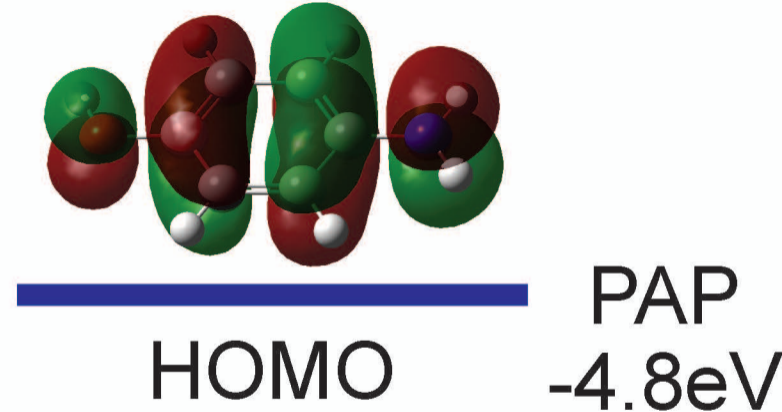

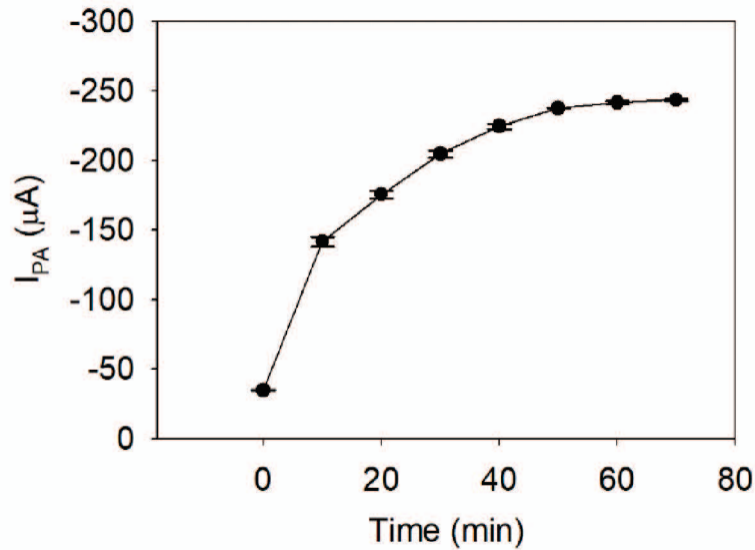



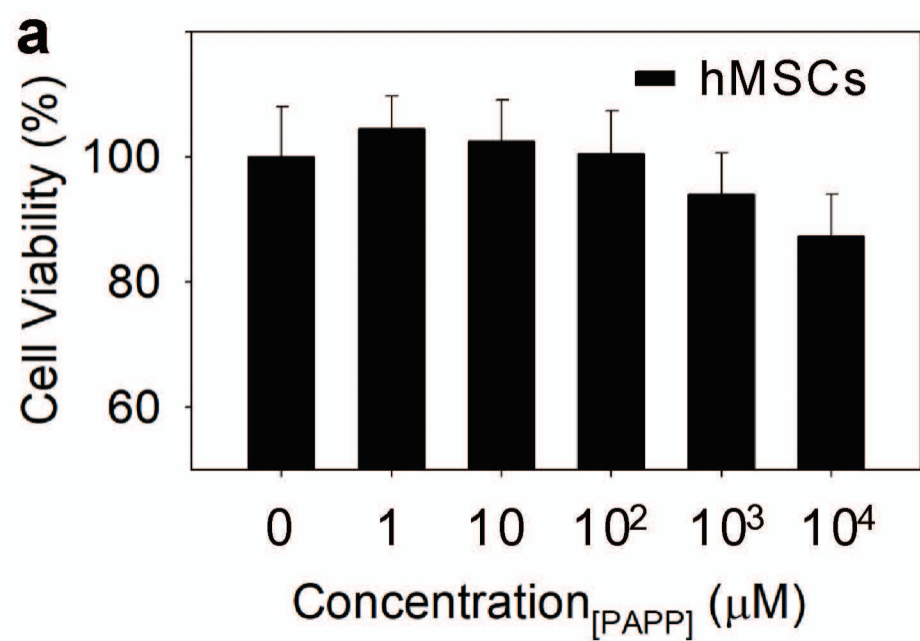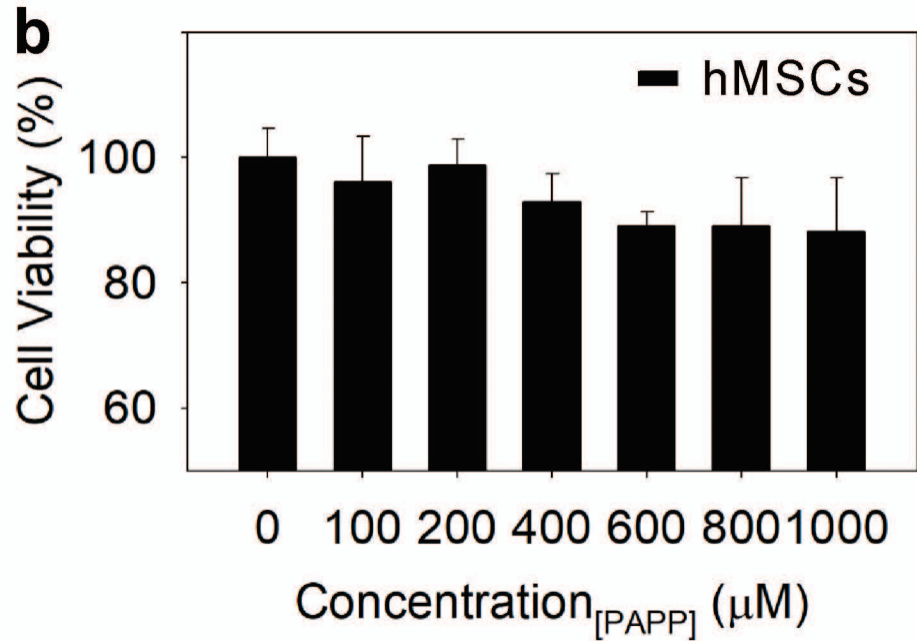

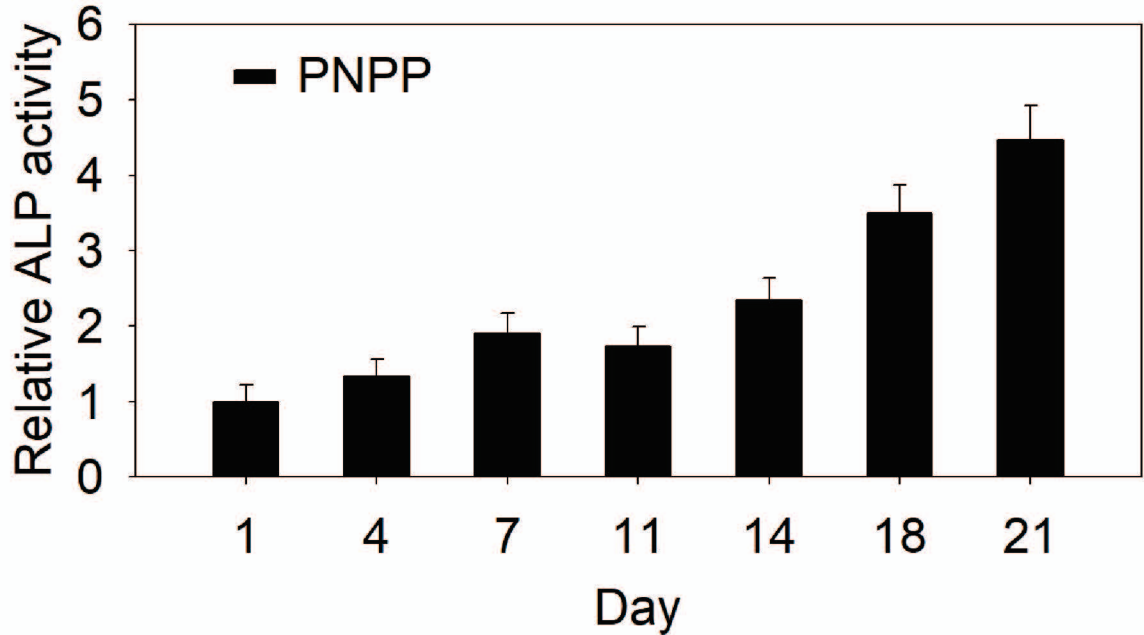



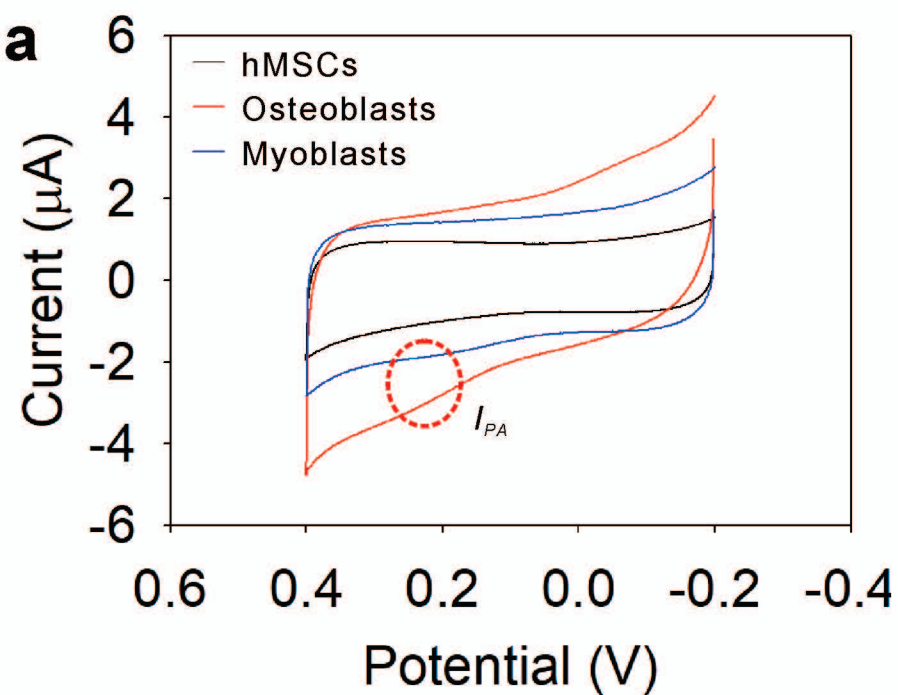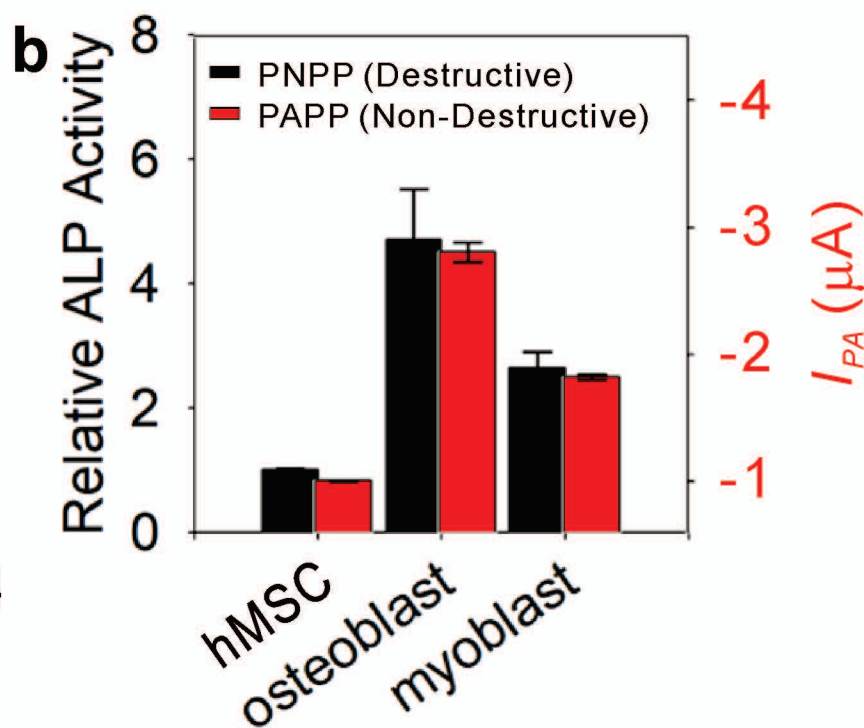

Supplement: NIHMS1016483-supplement-Supp_figS1-9.pdf [file NIHMS1016483-supplement-Supp_figS1-9.pdf]
